# Supplementary material for: Toward the development of prochelators as fluorescent probes of copper-mediated oxidative stress
Source: Royal Society of Chemistry journal article supplement (doi:10.1039/b914568k), 2009-10-17
Supplement: b914568k.pdf [file b914568k.pdf]

## Supplementary Information

### **Toward the Development of Prochelators as Fluorescent Probes of Copper-Mediated Oxidative Stress**

Lynne M. Hyman,<sup>a</sup> Clifton J. Stephenson,<sup>b</sup> Marina G. Dickens,<sup>a</sup> Ken D. Shimizu,<sup>b</sup> Katherine J. Franz\*<sup>a</sup>

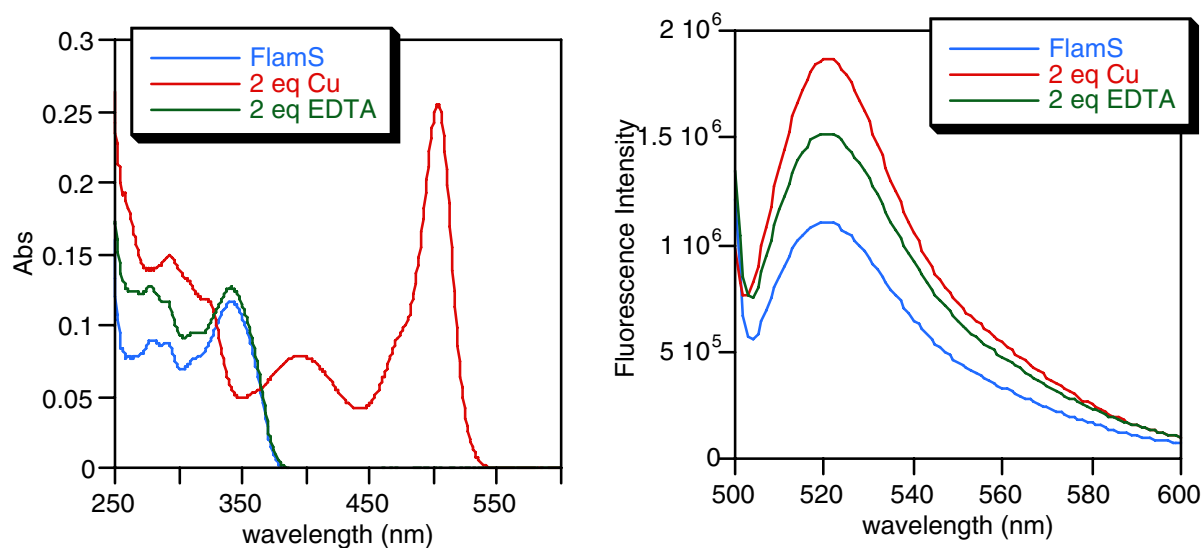

**Figure S1.** (Left) Addition of 2 equivalents of EDTA to a 10  $\mu\text{M}$  solution of FlamS containing 20  $\mu\text{M}$   $\text{Cu}^{2+}$  in 60/40 HEPES/DMSO solution (10 mM, pH = 7.4) results in complete restoration of the absorbance spectrum of FlamS, indicating reversibility of the metal–ligand interaction. (Right) In contrast, the fluorescence intensity of the EDTA-treated sample does not return completely to the baseline spectrum of FlamS, retaining some residual signal.  $\lambda_{\text{max}} = 495$  nm.

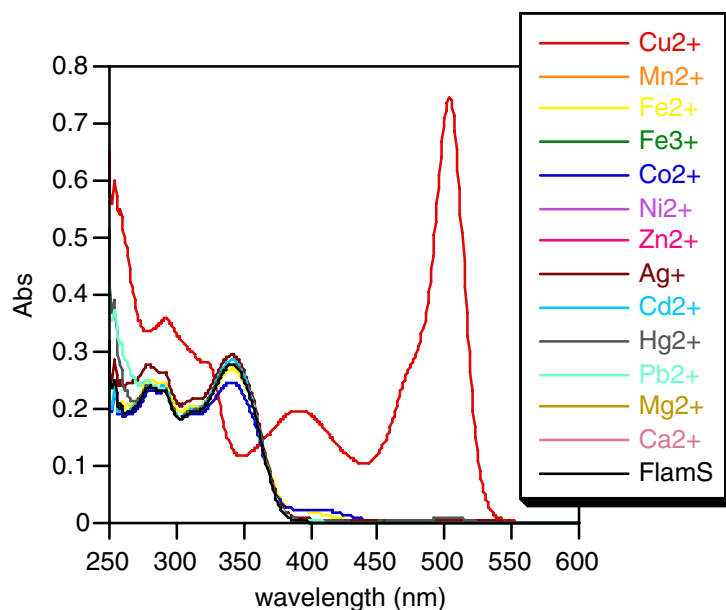

**Figure S2.** Aqueous solutions of  $\text{Fe}^{3+}$ ,  $\text{Fe}^{2+}$ ,  $\text{Ni}^{2+}$ ,  $\text{Zn}^{2+}$ ,  $\text{Mn}^{2+}$ ,  $\text{Cd}^{2+}$ ,  $\text{Hg}^{2+}$ ,  $\text{Pb}^{2+}$ ,  $\text{Co}^{2+}$ ,  $\text{Ag}^{+}$ ,  $\text{Ca}^{2+}$  and  $\text{Mg}^{2+}$  were titrated into solutions of 20  $\mu\text{M}$  FlamS in 60/40 HEPES/DMSO (10 mM, pH = 7.4). Up to 2 equivalents of the transition metals were added, while  $\text{Ca}^{2+}$  and  $\text{Mg}^{2+}$  were titrated up to concentrations of 5 mM. Minimal changes are seen to the FlamS absorbance spectra with metal cations, with the exception being  $\text{Cu}^{2+}$ , which shows an intense band at 500 nm indicating an open spirolactam ring.

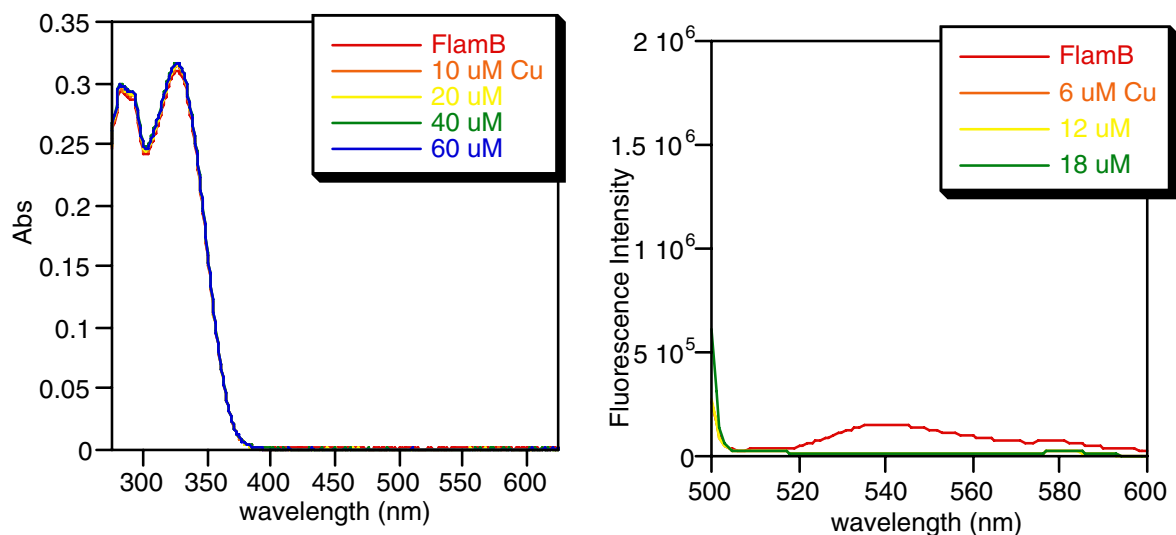

**Figure S3.** The boronic ester mask on FlamB was installed to prevent metal binding prior to H<sub>2</sub>O<sub>2</sub> exposure. No metal-dependent spectral changes are observed with the absorbance (left) or emission spectra (right) when FlamB (20 μM or 6 μM, respectively) is titrated with Cu<sup>2+</sup> up to 3 equivalents (shown above) in *organic* solvent (shown here: DMSO).  $\lambda_{\text{max}} = 495 \text{ nm}$ .

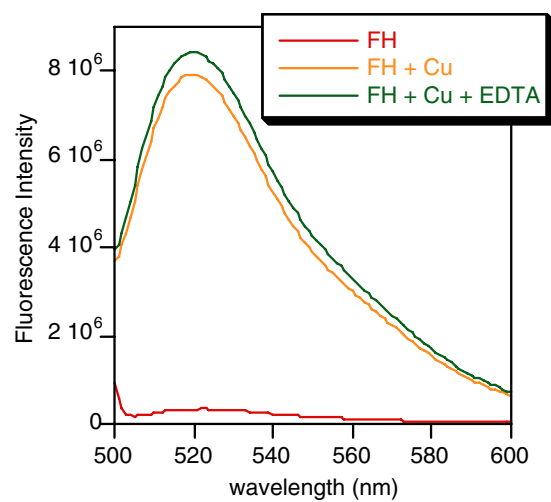

**Figure S4.** Emission spectra of FH (10  $\mu\text{M}$ ) in 60/40 HEPES/DMSO (10 mM, pH = 7.4) titrated with 1 equivalent of  $\text{CuSO}_4$  and EDTA.  $\lambda_{\text{max}} = 495 \text{ nm}$ .

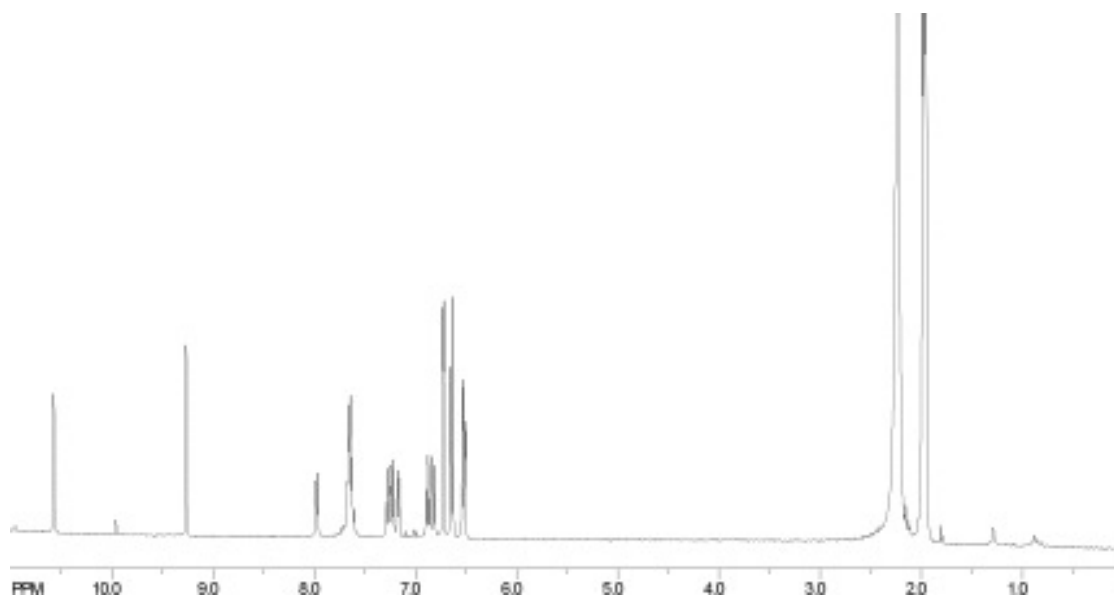

**Figure S5.** <sup>1</sup>H NMR spectra of **FlamS** (CD<sub>3</sub>CN, 300 MHz).

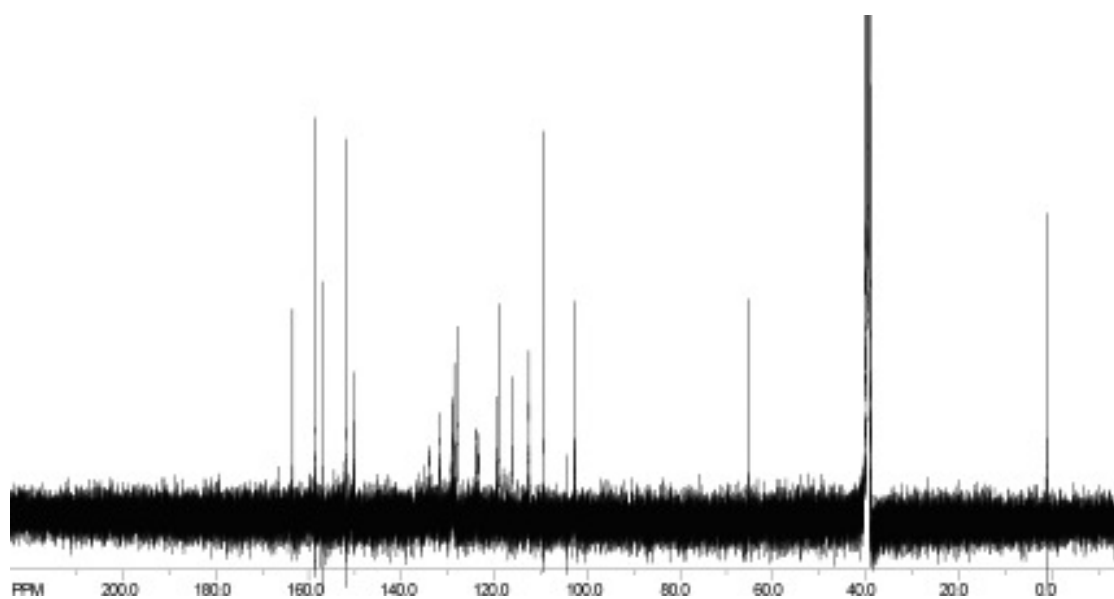

**Figure S6.** <sup>13</sup>C NMR spectra of **FlamS** (CD<sub>3</sub>CN, 100 MHz).

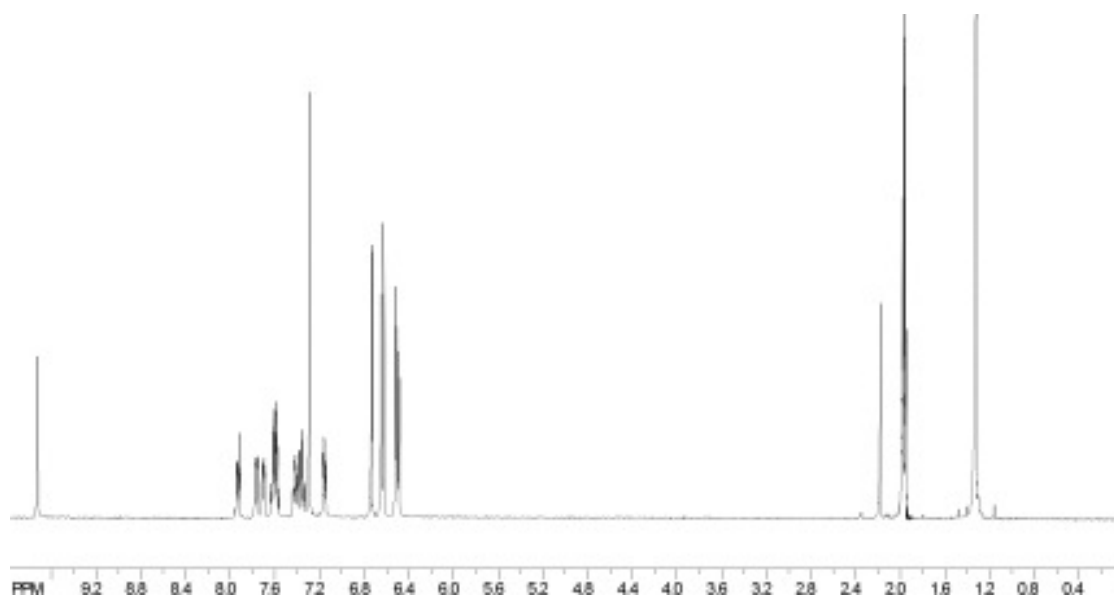

**Figure S7.** <sup>1</sup>H NMR spectra of **FlamB** (CD<sub>3</sub>CN, 400 MHz).

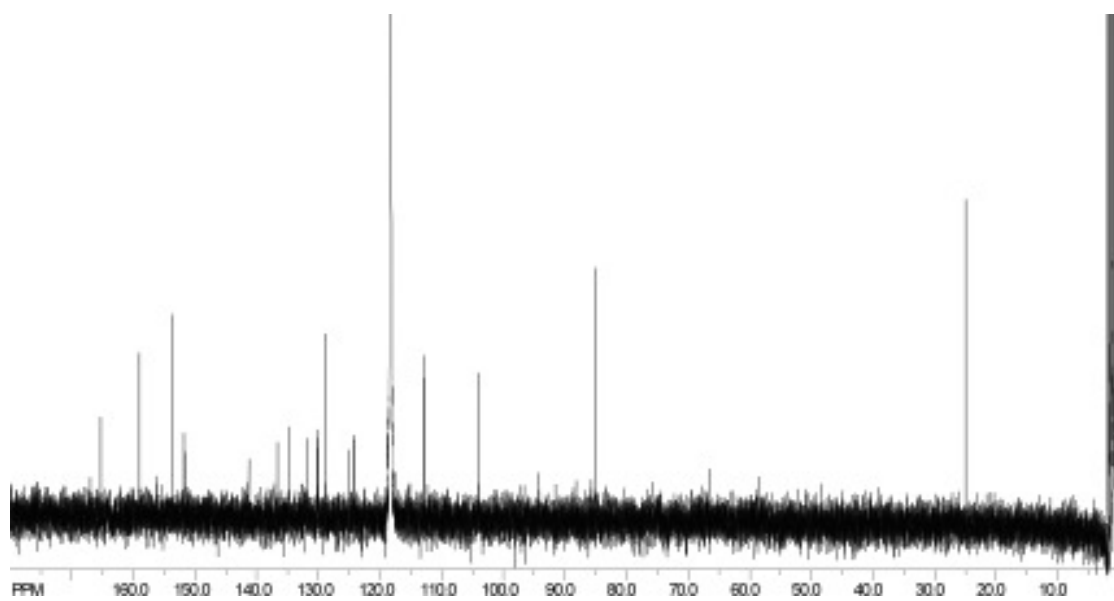

**Figure S8.** <sup>13</sup>C NMR spectra of **FlamB** (CD<sub>3</sub>CN, 100 MHz).

## X-ray Data Collection and Structure Solution Refinement

Flam S crystals were obtained by boiling in acetonitrile and allowing the solution to cool slowly. Flam B were grown by slow evaporation of hexanes and methanol and Cu-FlamS from the evaporation of methanol and ethanol. The crystals were mounted on a Cryoloop and held in place by hardened Karo syrup.

X-ray intensity data from a colorless prism of FlamS were measured at 150(2) K on a Bruker SMART APEX diffractometer (Mo K $\alpha$  radiation,  $\lambda = 0.71073 \text{ \AA}$ ).<sup>1</sup> Raw area detector data frame integration was performed with SAINT+ v6.45.<sup>1</sup> Final unit cell parameters were determined by least-squares refinement of 6388 reflections from the data set. Direct methods structure solution, difference Fourier calculations and full-matrix least-squares refinement against F<sup>2</sup> were performed with SHELXTL v6.14.1. The compound crystallizes in the space group P2<sub>1</sub>/n as determined by the pattern of systematic absences in the intensity data. The asymmetric unit consists of one C<sub>27</sub>H<sub>18</sub>N<sub>2</sub>O<sub>5</sub> molecule and a total of two acetonitrile-d<sub>3</sub> molecules of crystallization. One of the two CD<sub>3</sub>CN molecules (N4, C30, C31) is disordered over two independent positions with refined populations A/B = 0.661(3) / 0.339(3) (constrained to sum to unity). Atoms of these groups were refined isotropically, and C31A/C31B was refined with common atomic coordinates and displacement parameters. All other non-hydrogen atoms were refined with anisotropic displacement parameters. Hydrogen atoms bonded to carbon were placed in geometrically idealized positions and included as riding atoms. The oxygen-bound hydrogen atoms were located in difference maps and refined freely. The deuterium atoms were accounted for during refinement to give the correct F.W. and d(calc).

Data for FlamB and Cu-FlamS were collected at 296 K and 100 K, respectively, on a Bruker Kappa Apex II CCD diffractometer equipped with a graphite monochromator and a Mo K $\alpha$  fine-focus sealed tube ( $\lambda = 0.71073 \text{ \AA}$ ) operated at 1.75 kW power (50 kV, 35 mA). The detector was placed at a distance of 5.0 cm from the crystal. A total of 2655 frames were collected with a scan width of 0.5° and an exposure time of 10.0 and 30.0 sec/frame. The frames were integrated with the Bruker SAINT v7.12A software package<sup>1</sup> using a narrow-frame integration algorithm. Empirical absorption corrections were applied using SADABS v2.10 and the structure was checked for higher symmetry with PLATON v1.07. The structure was solved by direct methods with refinement by full-matrix least-squares based on F<sup>2</sup> using the Bruker SHELXTL Software Package. All non-hydrogen atoms were refined anisotropically. Hydrogen atoms of sp<sup>2</sup> hybridized carbons and nitrogens were located directly from the difference Fourier maps; all others were calculated. The asymmetric unit of FlamB contains one C<sub>33</sub>H<sub>29</sub>BN<sub>2</sub>O<sub>6</sub> molecule along with one H<sub>2</sub>O and one CH<sub>3</sub>OH. The asymmetric unit of Cu-FlamS consists of one [Cu<sub>2</sub>Cl(FlamS)<sub>2</sub>]Cl unit, where the outer-sphere chloride appears at two positions at half occupancy, both of which are disordered over two positions with refined populations of 0.3/0.2 and 0.35/0.15. There is also a NaOH with the Na at half occupancy and a disordered water molecule. Figures S8-S10 show fully labeled structures. Full lists of bond lengths and angles, atom coordinates, and anisotropic displacement parameters can be found in cif format in a separate file of Electronic Supporting Information.

---

<sup>1</sup> Bruker Analytical X-ray Systems, Inc., Madison, Wisconsin, USA.



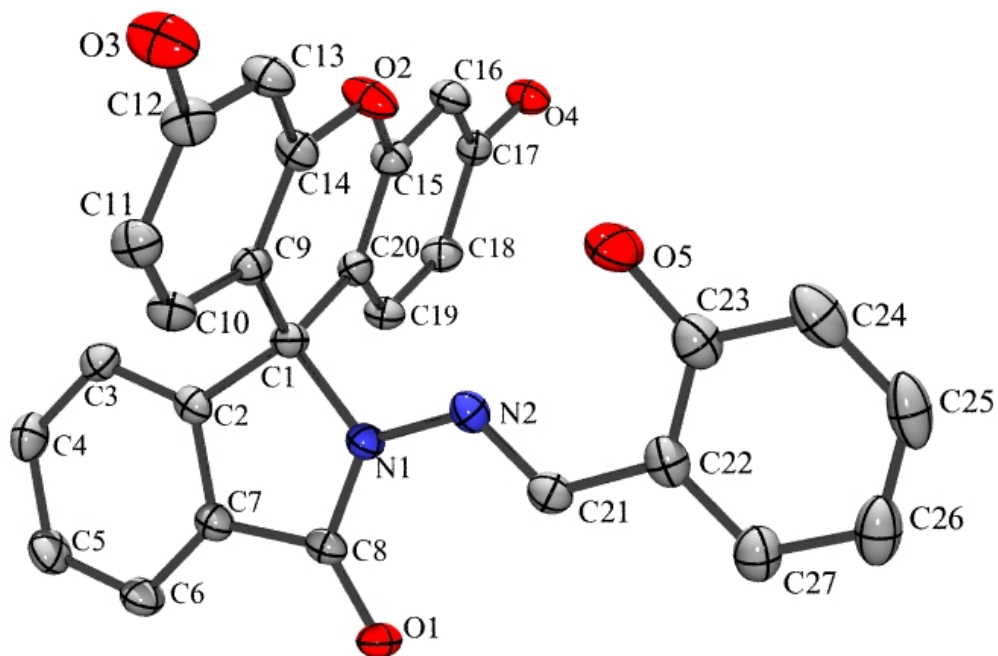

**Figure S9.** ORTEP diagram showing 50% thermal ellipsoid probability with full atom numbering scheme for FlamS. Hydrogen atoms and two acetonitrile molecules omitted for clarity.

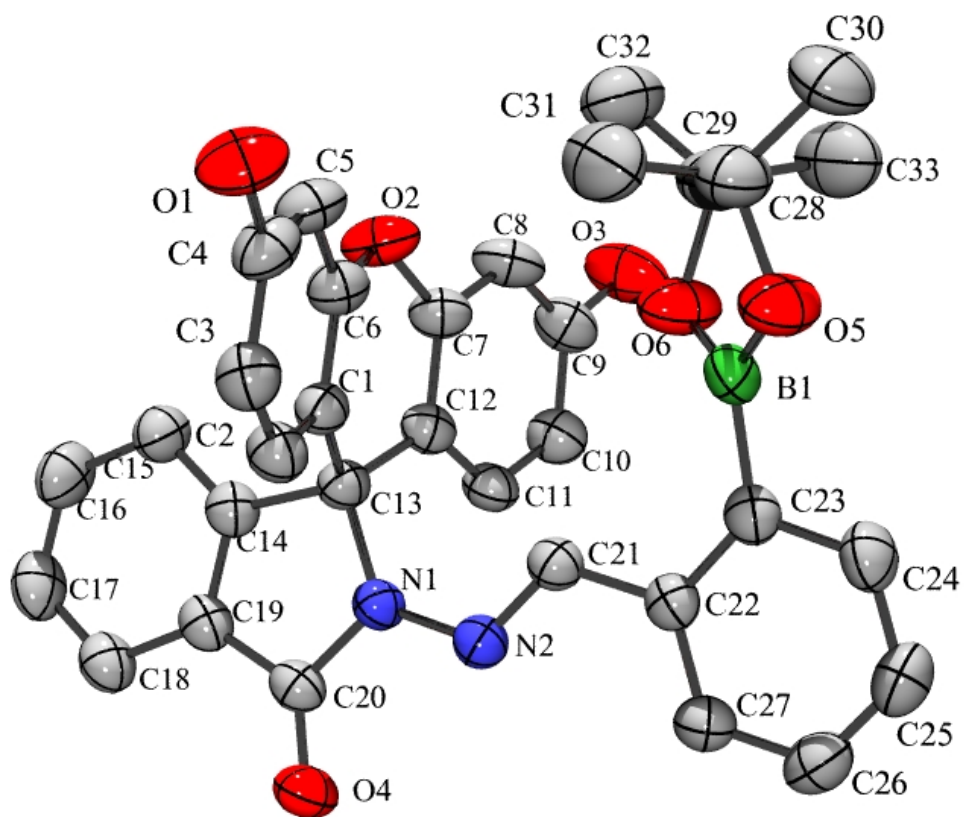

**Figure S10.** ORTEP diagram showing 50% thermal ellipsoid probability with full atom numbering scheme for FlambB. Hydrogen atoms and H<sub>2</sub>O and CH<sub>3</sub>OH omitted for clarity.

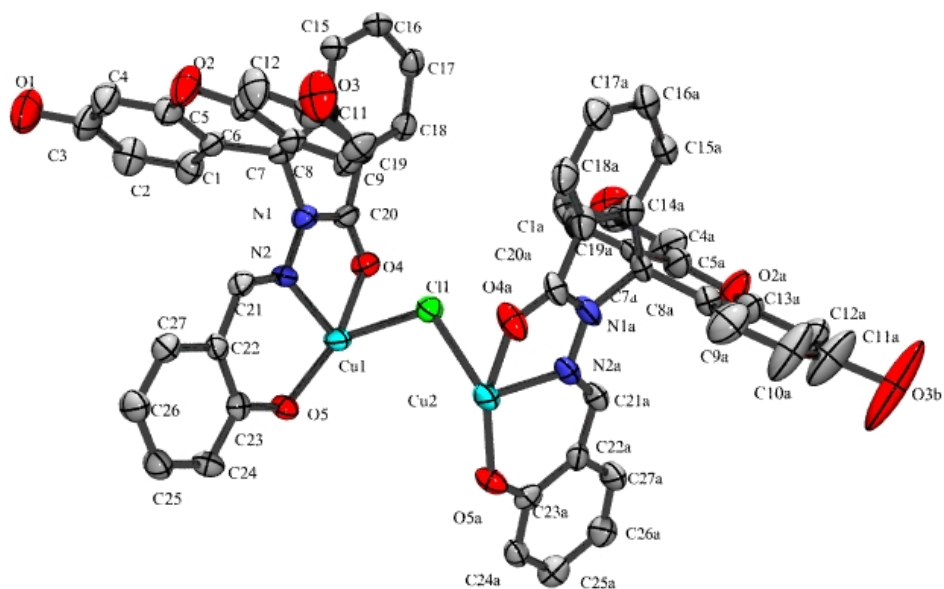

**Figure S11.** ORTEP diagram with 50% thermal ellipsoid probability showing asymmetric unit of  $[\text{Cu}_2(\text{FlamS})_2\text{Cl}]^+$  with full atom numbering scheme. Hydrogen atoms and outer-sphere  $\text{Cl}^-$ ,  $\text{NaOH}$ , and  $\text{H}_2\text{O}$  not shown.
